# Contrasting effects of accumulation and tolerance characteristics in *Arabidopsis thaliana* under Cr(III) and Cr(VI) stress

Yonghong Han<sup>1¶</sup>, Guotao Ding<sup>1¶</sup>, Peng Sun<sup>1</sup>, Giuiying Li<sup>2,\*</sup> and Weihao Li<sup>1,\*</sup>

<sup>1</sup>Handan Municipal Center for Disease Control and Prevention, Hebei, Handan 056000, China.

<sup>2</sup>School of Medicine, Hebei University of Engineering, Hebei, Handan 056000, China

<sup>#a</sup> Current Address: Handan Municipal Center for Disease Control and Prevention, Hebei, Handan 056000, China.

\* Corresponding author

E-Mail: hdlwh@alumni.tongji.edu.cn (Weihao Li); ORCID 0000-0002-6465-7269.

<sup>¶</sup>These authors contributed equally to this work.

## Abstract

In this study, for the first time we investigated Cr(III) and Cr(VI) stress-induced physiological and biochemical responses in *Arabidopsis thaliana*. The capacity of A. thaliana to accumulate Cr is closely related to the valence of chromium. Cr(VI) was more toxic than Cr(III) as indicated by chromium accumulation and growth inhibition. When the concentration of chromium is greater than 200µM, the root length and biomass of A. thaliana are reduced. But interestingly, Cr(III) at 200µM increased the root length and biomass of A. thaliana compared to the control. The transmission electron microscope shows that Cr(VI) can cause the chloroplasts damaged and the chlorophyll reduced more than Cr(III). The chloroplasts were filled the starch grains. An increase of lipid peroxidation in A. thaliana roots caused by Cr was measured, and this effect increases as the increasing Cr. It indicated that A. thaliana suffers from Cr-induced oxidative stress which resulted cell death in roots. To fight against oxidative stress, Ascorbate peroxidase and Glutathione reductase were activated by Cr in antioxidant defense. The inhibition of growth, the accumulation of chromium, the responses of antioxidant systems, and the ultra-morphological changes indicate that Cr(VI) was more toxic than Cr(III) .

**Keywords:** chromium; chromium accumulation; chloroplasts; Lipid peroxidation; *Arabidopsis thaliana*

## Introduction

Heavy metal is a major source of pollutants worldwide, leading to harmfully affecting human health when contaminants enter into agricultural lands and food chain.[1, 2]

Chromium (Cr) is widely used in many industrial fields such as electrodeposition, leather tanning, wood preservation, and pigments [3-5]. Due to the wide application of Chromium, large amounts of chromium-containing waste (liquid, solid and gaseous waste) are discharged into the environment, which eventually leads to biological and ecological pollution[6, 7]. The positive trivalent and the positive hexavalent are the most stable, although chromium can exhibit multiple forms (from  $-2$  to  $+6$ ). [8]

In recent years, more and more researchers pay close attention to the toxicity to plant by Cr. In most case, however, the toxicity data were about total Cr or Cr(VI) concentration[9, 10]. Research shows that different valence metals toxicity to aquatic organisms are not same. Therefore, in the risk assessment, biological toxicities which generated by the speciation of metals are indispensable.

The mobility, the bioavailability and the toxicity of Cr(III) and Cr(VI) are different. Cr(III) is an essential microelement necessary for the glucose metabolism in mammals, but not for the plants. In contrast, Cr(VI) is known carcinogens and classified as Group A (USEPA 1999). Previous

studies generally believe that Cr(VI) has more toxic effects than Cr(III), but some studies have found the opposite result [11, 12]. These contradictory conclusions have aroused the interest of our research team.

To our knowledge, there are not any reports in which physiological and biochemical responses in *A. thaliana* was investigated under the stresses of Cr(III) and Cr(VI) [13, 14]. For this purpose, our team prepared medium containing different concentrations of Cr(III) and Cr(VI) and applied it to *A. thaliana* culture. In this study, we evaluated the effects of different concentrations of Cr(III) and Cr(VI) on the physiological biochemical and the enrichment effects of *A. thaliana*. Furthermore, evidence for altering the ultrastructural level of *A. thaliana* after chromium stress is also provided.

## Materials and methods

### Plant preparation

The seeds are washed with 75% ethanol once and washed with distilled water for 5 times (1 minute each time). The washed seeds were vernalized 3 days in the dark at 4 °C in petri dishes containing MS agar. *A. thaliana* grown in long-day conditions (16-h-light/8-h-dark photoperiod) 90 μM m<sup>-2</sup> s<sup>-1</sup> PAR, 70% RH, and 22°C. After 7 days, the plants were transferred to MS solution with different concentrations (from 100 to 700 μM) of Cr(III) supplied as Cr(NO)<sub>3</sub>, or Cr(VI) supplied as K<sub>2</sub>Cr<sub>2</sub>O<sub>7</sub>. The control group was grown for 14 days without adding Cr. The continuously MS solution

95 was renewed once a week.

## 96 **Growth status measurements**

97 30 seedlings for each treatment were harvested after 14 days. The root  
98 length of the sample under different treatment was measured separately.  
99 To measure the dry mass, the sample is weighed after constant weight. The  
100 mean values were calculated.

## 101 **Determination of Cr Contents**

102 Roots and leaves were harvested after 14 days of chromium stress,  
103 rinsed with 5% EDTA for one time, and rinsed 5 times with sterile water  
104 (5 minutes each time). Leaves and roots were pre-dried to a constant  
105 weight at 60 degrees Centigrade, and were ashed at 550°C. The ashing  
106 product was dissolved with 2 mL 1:1 (v/v) HNO<sub>3</sub>, transmit into 25 ml  
107 volumetric flask and bring to volume by 0.1% NaOH solution. [15, 16] The  
108 concentration of Cr was accurately measured by an atomic absorption  
109 spectrophotometer (HITACHI Z5000). Each sample was repeated five  
110 replicates.

## 111 **Measurement of Photosynthetic Pigments**

112 After 14 days of chromium stress, 0.2g fresh leaves were extracted  
113 with 80% acetone in the dark by tissue homogenization method until the  
114 color of leaf tissue completely disappeared. The concentrations of  
115 chlorophyll (a, b) and carotenoids were detected using the  
116 spectrophotometer (723N, Jingke, Shanghai, China).

## **Estimation of antioxidant enzymes and lipid peroxidation**

4mL of 4°C pre-cooled 50 mM phosphate buffer (pH 7.8) were added into 1.0 g seedling roots in an ice bath. The sample containing the phosphate buffer was homogenized. The homogenate was centrifuged at 12000 rpm for 10 minutes at 4 °C. Discard the precipitate and the supernatant for subsequent experiments. The Lipid peroxidation increasing was estimated by malondialdehyde (MDA) method according to reported paper of Zhou et al[17]. The activity of superoxide dismutase (EC 1.15.1.1, SOD) was measured by the nitroblue tetrazolium (NBT) method[18]. Catalase (EC 1.11.1.6, CAT) activity was detected by the method of Aebi[19]. Peroxidase (EC 1.11.1.7, POD) activity was analyzed according to the method of Zhou[20]. Ascorbate peroxidase (EC 1.11.1.11, APX) activity was measured by the method of Nakano and Asada[21]. Glutathione reductase (EC 1.6.4.2, GR) activity was analyzed by Garcia-Limones et al[22].

## **Ultramicroscopic Observations and Trypan Blue staining**

The method that we used to detect the dead tissues and cells is Trypan blue. According to the protocols of our senior scholars, Chen et al[23], 10 root samples under each treatment were treated for 15 minutes in 0.04% trypan blue aqueous solution. The stained samples were washed 4 times with sterile water (2 minutes each time), and were soaked overnight.

Under the chromium stress for 14 days, the leave samples were soaked

with 2.5% glutaraldehyde for 12 hours at 4 °C. The fixed sample was rinsed 4 times with phosphate buffer (0.1 M, pH 7.0) for 5 minutes each time. Then, we used the 1% OsO<sub>4</sub> phosphate buffer to fix samples for 2 hours, and after that the fixed samples were washed with phosphate buffer 4 times(5 minutes each time). Subsequently, the samples were dehydrated with different concentrations of ethanol, which the volume concentration of ethanol was 30%, 50%, 70%, 90%.. Finally the leaves were coated with Epon resin[24]. The Ultracut Eultramicrotome (Leica, Germany) was used for ultrathin sections of 70 nm thickness. The microstructure was observed by a JEL-1230 transmission electron microscope (TEM, Hitachi, Japan).

## Statistical analysis

Statistical analysis of the data was performed using the SPSS 16.0 (SPSS, Chicago, IL, USA). Each experiment was repeated at least three times. Different letters on tables and histograms indicate that a difference at the  $P < 0.05$  level.

## Results and discussion

### Growth Inhibition of *A. thaliana* exposure to Cr(III) and Cr(VI).

**Fig 1. A** shows the morphology of three-week-old *A. thaliana* exposed to graded concentrations of Cr. It shows Cr concentrations in the culture medium of up to 200μM exhibited no obvious toxicity on seeding growth of *A. thaliana*, but exhibited significantly suppress gradually at the

concentration of 300 $\mu$ M, 500 $\mu$ M and 700 $\mu$ M. As roots are the first one to come in contact with the Cr, their growth receive the most impact . In this study, the decrease of root length was observed from 300 $\mu$ M for Cr(III) and Cr(VI). The highest root length decrease was obtained for 700 $\mu$ M concentration with 51% and 57% for Cr(III) and Cr(VI), respectively(Fig 1 B). Interestingly, a relatively low concentration (200 $\mu$ M) of Cr(III) caused a significant increase in dry biomass as compared to the control. On the contrary, dry biomass decreased gradually from 300 $\mu$ M to 700 $\mu$ M for Cr(III) and Cr(VI). In the concentration of 700 $\mu$ M, the decrease was up to 47% and 73% for Cr(III) and Cr(VI), respectively(Fig 1 C).

**Fig 1. Physiological effects of Cr(III) and Cr(VI) on *A. thaliana*.** (A)

Images of *A. thaliana* exposed to Cr(III) and Cr(VI); (B) Root length; (C) Dry biomass. Data are mean  $\pm$  standard error of five replicates. Different letters on histograms are statistically different ( $P < 0.05$ ).

It is proved that the toxicity of Cr(VI) is stronger than that of Cr(III) by measuring the growth of *A. thaliana*. Whether Cr(III) or Cr(VI), when the concentration of Cr reaches or exceeds 200 $\mu$ M, the inhibition of *A. thaliana* growth was observed. But interestingly, at 200 $\mu$ M, Cr(III) caused a statistically significant increase in dry biomass as compared to the control. It indicated a relatively low concentration of Cr(III) can stimulate *A. thaliana* growth.

**Cr uptake and accumulation in *A. thaliana***

**Fig 2.** indicates the content of chromium in different parts of *A. thalian*. The capacity of *A. thalian* to accumulate Cr is closely related to the valence of chromium. The accumulation of Cr in roots, it do not distinguish between Cr(III) and Cr(VI), was higher than in leaves. After concentration were measured, the Cr(VI) was higher than the Cr(III) in root tissues. The concentration of chromium in roots can reach up to 1650 $\mu\text{g g}^{-1}$  DW under 700 mM Cr(VI) stress, whereas only 1129 $\mu\text{g g}^{-1}$  exposed to 700 $\mu\text{M}$  Cr(III).

**Fig. 2 The contents of Cr in roots and shoots of *A. thaliana*, after treated by Cr(III) and Cr(VI)for 14 d.** Data are mean  $\pm$  standard error of five replicates. Different letters on histograms are statistically different ( $P < 0.05$ ).

### **Photosynthetic pigments analysis**

Chlorophyll is a key index for the degree of toxicity by abiotic stresses on plants[25-27]. Under the chromium stress for 14 days, the total chlorophyll contents of fresh leaves were measured. The contents of chlorophyll a, chlorophyll b and total chlorophyll were reduced in *A. thalian*, under the stress of 100 $\mu\text{M}$  Cr(VI). Total chlorophyll fell by 53%, under the stress of Cr(VI) (Table 1). Moreover, the ratio of chlorophyll a/b obviously increase under the treatment of 200 $\mu\text{M}$  Cr(VI) indicated that chlorophyll b was more sensitive than the chlorophyll a under the stress. The maximum is 2.38. The effect of Cr(III)on chlorophyll of *A. thalian* is relatively light. The radio of chlorophyll a/b is reduced only with 700 $\mu\text{M}$

205 Cr(III).

206 But the toxicity caused by Cr(III) and Cr(VI) was different on  
 207 carotenoid. Carotenoid is a known pigments that protecting plant organs  
 208 when the plant under stress[28, 29]. In this study, an increase of carotenoid  
 209 was observed in *A. thalian* treated with Cr(VI). With 300μM of Cr(VI),  
 210 The carotenoid content increase by 52%. Thus, the continuous increase of  
 211 carotenoid under Cr(VI) stresses suggest that carotenoid has a role in  
 212 reducing the toxicity of hexavalent chromium. Cr(VI).

213 Table 1. Effects of Cr(III) and Cr(VI) on the content of chlorophyll pigment in the leaves of *A. thaliana* .

214

| Cr<br>( $\mu$ M) | Total chlorophyll<br>(mg g <sup>-1</sup> FW) |                         | Chlorophyll a<br>(mg g <sup>-1</sup> FW) |                         | Chlorophyll b<br>(mg g <sup>-1</sup> FW) |                          | Chlorophyll<br>a/b      |                          | Carotenoid<br>(mg g <sup>-1</sup> FW) |                          |
|------------------|----------------------------------------------|-------------------------|------------------------------------------|-------------------------|------------------------------------------|--------------------------|-------------------------|--------------------------|---------------------------------------|--------------------------|
|                  | Cr(III)                                      | Cr(VI)                  | Cr(III)                                  | Cr(VI)                  | Cr(III)                                  | Cr(VI)                   | Cr(III)                 | Cr(VI)                   | Cr(III)                               | Cr(VI)                   |
|                  |                                              |                         |                                          |                         |                                          |                          |                         |                          |                                       |                          |
| 0                | 0.96±0.033 <sup>a</sup>                      | 0.96±0.033 <sup>a</sup> | 0.60±0.006 <sup>a</sup>                  | 0.60±0.006 <sup>a</sup> | 0.36±0.027 <sup>a</sup>                  | 0.36±0.027 <sup>a</sup>  | 1.67±0.110 <sup>a</sup> | 1.67±0.110 <sup>c</sup>  | 0.17±0.025 <sup>a</sup>               | 0.17±0.025 <sup>c</sup>  |
| 100              | 0.90±0.018 <sup>a</sup>                      | 0.83±0.098 <sup>b</sup> | 0.58±0.010 <sup>a</sup>                  | 0.53±0.057 <sup>a</sup> | 0.32±0.015 <sup>a</sup>                  | 0.30±0.064 <sup>ab</sup> | 1.81±0.091 <sup>a</sup> | 1.77±0.073 <sup>bc</sup> | 0.16±0.023 <sup>a</sup>               | 0.20±0.010 <sup>b</sup>  |
| 200              | 0.95±0.084 <sup>a</sup>                      | 0.65±0.023 <sup>c</sup> | 0.60±0.043 <sup>a</sup>                  | 0.45±0.004 <sup>b</sup> | 0.35±0.041 <sup>a</sup>                  | 0.20±0.021 <sup>b</sup>  | 1.71±0.421 <sup>a</sup> | 2.25±0.287 <sup>a</sup>  | 0.14±0.022 <sup>a</sup>               | 0.24±0.009 <sup>ab</sup> |
| 300              | 0.75±0.118 <sup>b</sup>                      | 0.54±0.024 <sup>c</sup> | 0.48±0.099 <sup>b</sup>                  | 0.38±0.003 <sup>b</sup> | 0.27±0.006 <sup>b</sup>                  | 0.16±0.041 <sup>c</sup>  | 1.78±0.012 <sup>a</sup> | 2.38±0.114 <sup>a</sup>  | 0.15±0.002 <sup>a</sup>               | 0.26±0.008 <sup>a</sup>  |
| 500              | 0.70±0.026 <sup>b</sup>                      | 0.54±0.036 <sup>c</sup> | 0.45±0.020 <sup>bc</sup>                 | 0.35±0.045 <sup>b</sup> | 0.25±0.019 <sup>b</sup>                  | 0.19±0.027 <sup>bc</sup> | 1.81±0.275 <sup>a</sup> | 1.84±0.209 <sup>b</sup>  | 0.14±0.028 <sup>a</sup>               | 0.22±0.038 <sup>b</sup>  |
| 700              | 0.61±0.029 <sup>b</sup>                      | 0.45±0.087 <sup>d</sup> | 0.42±0.015 <sup>d</sup>                  | 0.30±0.123 <sup>b</sup> | 0.19±0.008 <sup>b</sup>                  | 0.15±0.009 <sup>c</sup>  | 2.21±0.093 <sup>b</sup> | 2.01±0.318 <sup>ab</sup> | 0.10±0.041 <sup>b</sup>               | 0.21±0.006 <sup>b</sup>  |

215

216 All the values are the means of five replicates. Different letters on histograms are statistically different (P < 0.05).

## Antioxidant enzyme analysis

In process of abiotic stresses of plants, Membrane lipids are one of the key cellular targets. The lipid peroxidation is considered to have the function of mobbing free radical[30, 31]. Thus, the contents of lipid peroxidation in roots were determined by the TBA method. All available data suggest that a concentration-dependent increase of MDA in *A. thaliana* roots caused by Cr. The MDA content was higher in *A. thaliana* exposed to Cr(VI) than for Cr(III). (Table 2)

225 Table 1. Effects of Cr(III) and Cr(VI) on the content of chlorophyll pigment in the leaves of *A. thaliana* .

226

| Cr<br>( $\mu$ M) | Total chlorophyll<br>(mg g <sup>-1</sup> FW) |                         | Chlorophyll a<br>(mg g <sup>-1</sup> FW) |                         | Chlorophyll b<br>(mg g <sup>-1</sup> FW) |                          | Chlorophyll<br>a/b      |                          | Carotenoid<br>(mg g <sup>-1</sup> FW) |                          |
|------------------|----------------------------------------------|-------------------------|------------------------------------------|-------------------------|------------------------------------------|--------------------------|-------------------------|--------------------------|---------------------------------------|--------------------------|
|                  | Cr(III)                                      | Cr(VI)                  | Cr(III)                                  | Cr(VI)                  | Cr(III)                                  | Cr(VI)                   | Cr(III)                 | Cr(VI)                   | Cr(III)                               | Cr(VI)                   |
|                  |                                              |                         |                                          |                         |                                          |                          |                         |                          |                                       |                          |
| 0                | 0.96±0.033 <sup>a</sup>                      | 0.96±0.033 <sup>a</sup> | 0.60±0.006 <sup>a</sup>                  | 0.60±0.006 <sup>a</sup> | 0.36±0.027 <sup>a</sup>                  | 0.36±0.027 <sup>a</sup>  | 1.67±0.110 <sup>a</sup> | 1.67±0.110 <sup>c</sup>  | 0.17±0.025 <sup>a</sup>               | 0.17±0.025 <sup>c</sup>  |
| 100              | 0.90±0.018 <sup>a</sup>                      | 0.83±0.098 <sup>b</sup> | 0.58±0.010 <sup>a</sup>                  | 0.53±0.057 <sup>a</sup> | 0.32±0.015 <sup>a</sup>                  | 0.30±0.064 <sup>ab</sup> | 1.81±0.091 <sup>a</sup> | 1.77±0.073 <sup>bc</sup> | 0.16±0.023 <sup>a</sup>               | 0.20±0.010 <sup>b</sup>  |
| 200              | 0.95±0.084 <sup>a</sup>                      | 0.65±0.023 <sup>c</sup> | 0.60±0.043 <sup>a</sup>                  | 0.45±0.004 <sup>b</sup> | 0.35±0.041 <sup>a</sup>                  | 0.20±0.021 <sup>b</sup>  | 1.71±0.421 <sup>a</sup> | 2.25±0.287 <sup>a</sup>  | 0.14±0.022 <sup>a</sup>               | 0.24±0.009 <sup>ab</sup> |
| 300              | 0.75±0.118 <sup>b</sup>                      | 0.54±0.024 <sup>c</sup> | 0.48±0.099 <sup>b</sup>                  | 0.38±0.003 <sup>b</sup> | 0.27±0.006 <sup>b</sup>                  | 0.16±0.041 <sup>c</sup>  | 1.78±0.012 <sup>a</sup> | 2.38±0.114 <sup>a</sup>  | 0.15±0.002 <sup>a</sup>               | 0.26±0.008 <sup>a</sup>  |
| 500              | 0.70±0.026 <sup>b</sup>                      | 0.54±0.036 <sup>c</sup> | 0.45±0.020 <sup>bc</sup>                 | 0.35±0.045 <sup>b</sup> | 0.25±0.019 <sup>b</sup>                  | 0.19±0.027 <sup>bc</sup> | 1.81±0.275 <sup>a</sup> | 1.84±0.209 <sup>b</sup>  | 0.14±0.028 <sup>a</sup>               | 0.22±0.038 <sup>b</sup>  |
| 700              | 0.61±0.029 <sup>b</sup>                      | 0.45±0.087 <sup>d</sup> | 0.42±0.015 <sup>d</sup>                  | 0.30±0.123 <sup>b</sup> | 0.19±0.008 <sup>b</sup>                  | 0.15±0.009 <sup>c</sup>  | 2.21±0.093 <sup>b</sup> | 2.01±0.318 <sup>ab</sup> | 0.10±0.041 <sup>b</sup>               | 0.21±0.006 <sup>b</sup>  |

227

228 All the values are the means of five replicates. Different letters on histograms are statistically different (P < 0.05).

In order to mitigate oxidative damage, a series of antioxidant systems were initiated in plants. Practically, antioxidant enzymes such as CAT and SOD are thought to play an important role in the stress process[32, 33]. The POD, CAT, and ascorbate–glutathione cycle (GR and APX), in scavenging H<sub>2</sub>O<sub>2</sub> are more than important[34]. In this study, a gradual and continual drop of SOD and POD was observed in *A. thaliana* treated with Cr(VI) from 100µM and with Cr(III) from 200µM. CAT activity was not significantly affected by Cr stress except treated with 700µM Cr(VI). Chromium stress significantly increases the activity of APX and GR. APX activity enhanced respectively up to 1.7 and 2.1 times of control for the Cr(III) and Cr(VI) at 200µM. With GR, the highest value was 2.1 fold of control at 500µM Cr(III), 2.9 fold at 300µM Cr(VI). It indicates that enzymes engaged in antioxidant defence: APX and GR were activated by Cr, while SOD and POD activity was inhibited.

### **The ultra-morphological changes under Cr**

Cell mortality of roots under Cr stress was determined by Trypan blue staining. In the results of the trypan blue test, no obvious damage was found in the unstressed blank group. (Fig 3). Staining was detected from 500µM Cr(III) and 200µM Cr(VI), which was more extensive with increasing Cr concentrations.

**Fig. 3 Detection of cell death (by Trypan blue staining) in root tips of *A. thaliana*.** (A) Cr(III) treated roots; (B) Cr(VI) treated roots.

These results of ultra-morphological can be mutually verified by the result of lipid peroxidation experiments. This research shown that the Cr (VI) effect was more heavy than Cr(III)by the results of cell death in roots.

The percentage of intact chloroplasts with orderly arrangement of grana and stroma thylakoid approached 100 percent in the control plant leaves (Fig 4A). Under the Cr(III) treatment, 2-3 starch grains(Sg) appeared and the thylakoid became obscure at 200 $\mu$ M(Fig 4B). At 500 $\mu$ M Cr(III), The continuous increase of Sg is accompanied by further thylakoid disintegrated (Fig 4C) . At 200 $\mu$ M Cr(VI), there are 4–6 Sg in chloroplasts and the thylakoids were disorderly arranged (Fig 4D). When the concentration of Cr(VI) reached 500 $\mu$ M, chloroplasts filled with huge Sg, the thylakoid was disappeared(Fig 4E). In conclusion, the chloroplasts of *A. thaliana* can be damaged by Cr(III) or Cr(VI), thus reducing chlorophyll content. This corresponds to the previous result.

**Fig. 4 Effects of Cr(III) and Cr(VI) on chloroplasts in leaves' cells of *A. thaliana*.**(A) Control; (B) Treated with 200 $\mu$ M Cr(III) ; (C) Treated with 500 $\mu$ M Cr(III); (D) Treated with 200 $\mu$ M Cr(VI) ; (E) Treated with 500 $\mu$ M Cr(VI).

## Conclusions

In this study, we first investigated the physiological, morphological and biochemical reactions of *A. thaliana* under Cr(III) and Cr(VI) stress. The collection capacity for Cr was determined by roots which is the main organ of accumulation, irrespective of Cr(III) and Cr(VI).Our data proved

that the intake of Cr(VI) was higher than the intake of Cr(III), in the roots.

At 700 $\mu$ M, the Cr(VI) accumulation in the roots of *A. thaliana* was about

1.5times higher than the Cr(III). Cr toxicity in *A. thaliana* is closely

related to the valence of chromium and the concentration in the nutrient

media. It is proved that the toxicity of Cr(VI) is stronger than that of Cr(III)

by measuring the growth of *A. thaliana*. Whether Cr(III) or Cr(VI), when

the concentration of Cr reaches or exceeds 200 $\mu$ M, the inhibition of *A.*

*thaliana* growth was observed. But interestingly, at 200 $\mu$ M, Cr(III) caused

a statistically significant increase in dry biomass as compared to the control.

It indicated a relatively low concentration of Cr(III) can stimulate *A.*

*thaliana* growth.

All available data suggest that a concentration-dependent increase of

MDA in *A. thaliana* roots caused by Cr. The MDA content was higher in

*A. thaliana* exposed to Cr(VI) than for Cr(III). These results are consistent

with Trypan blue staining assay, and the effect was more pronounced

following Cr(VI) exposure. It indicated that *A. thaliana* suffers from Cr

stress, which resulted cell death in roots. For further investigate the

mechanism of oxidative stress in Cr toxicity, we focused on some

antioxidative enzymes such as SOD, POD, CAT,GR and APX. In this

study, a gradual and continual drop of SOD and POD was observed in *A.*

*thalian* treated with Cr(VI) from 100 $\mu$ M and with Cr(III) from 200 $\mu$ M .

CAT activity was not significantly affected by Cr stress except treated with

700µM Cr(VI). Chromium stress significantly increases the activity of APX and GR. APX activity enhanced respectively up to 1.7 and 2.1 times of control for the Cr(III) and Cr(VI) at 200µM. With GR, the highest value was 2.1 fold of control at 500µM Cr(III), 2.9 fold at 300µM Cr(VI). It indicates that enzymes engaged in antioxidant defence: APX and GR were activated by Cr, while SOD and POD activity was inhibited. All data indicated that Cr(VI) was more toxic than Cr(III) in physiological responses.

TEM shows that both Cr(III) and Cr(VI) can cause the chloroplasts damaged and filled the starch grains, chlorophyll a, chlorophyll b and total chlorophyll consequently reduced. But the toxicity caused by Cr(III) and Cr(VI) was different on carotenoid. An increase of carotenoid was measured in *A. thaliana* treated with Cr(VI). With 300µM of Cr(VI), there is an increase of 52%. Thus, consistently increasing amounts of carotenoid under Cr(VI) stresses suggest that Cr(VI) can stimulate the synthesis of carotenoid to detoxified toxicities.

## Acknowledgements

This work was supported by a key scientific and research project grant funded by the Hebei Science and Technology Department (17275505D).

## Compliance with Ethical Standards

**Conflicts of Interest** The authors declare that they have no

conflict of interest.

## References

1. Prigione V, Zerlotti M, Refosco D, Tigini V, Anastasi A, Varese GC. Chromium removal from a real tanning effluent by autochthonous and allochthonous fungi. *Bioresource Technology*. 2009;100(11):2770-6. PubMed PMID: WOS:000264906000003.
2. Yang QQ, Li ZY, Lu XN, Duan QN, Huang L, Bi J. A review of soil heavy metal pollution from industrial and agricultural regions in China: Pollution and risk assessment. *Science of the Total Environment*. 2018;642:690-700. PubMed PMID: WOS:000439405600069.
3. Shen F, Liao RM, Ali A, Mahar A, Guo D, Li RH, et al. Spatial distribution and risk assessment of heavy metals in soil near a Pb/Zn smelter in Feng County, China. *Ecotoxicology and Environmental Safety*. 2017;139:254-62. PubMed PMID: WOS:000396640600033.
4. Xiao W, Yang X, He Z, Rafiq MT, Hou D, Li T. Model for Evaluation of the Phytoavailability of Chromium (Cr) to Rice (*Oryza sativa* L.) in Representative Chinese Soils. *Journal of Agricultural and Food Chemistry*. 2013;61(12):2925-32. PubMed PMID: WOS:000317031800004.
5. Ding G, Jin Z, Han Y, Sun P, Li G, Li W. Mitigation of chromium toxicity in *Arabidopsis thaliana* by sulfur supplementation. *Ecotoxicol Environ Saf*. 2019;182:109379. doi: 10.1016/j.ecoenv.2019.109379. PubMed PMID: 31254852.
6. Wu Z, McGrouther K, Chen D, Wu W, Wang H. Subcellular Distribution of Metals within *Brassica chinensis* L. in Response to Elevated Lead and Chromium Stress. *Journal of Agricultural and Food Chemistry*. 2013;61(20):4715-22. doi: 10.1021/jf4005725.
7. Zhang D, Liu J, Qi T, Ge B, Wang Z, Jiang S, et al. Transcriptome Analysis of Hepatopancreas from the Cr (VI)-Stimulated Mantis Shrimp (*Oratosquilla oratoria*) by Illumina Paired-End Sequencing: Assembly, Annotation, and Expression Analysis. *Journal of Agricultural and Food Chemistry*. 2018;66(11):2598-606. doi: 10.1021/acs.jafc.7b05074.
8. Martone N, Rahman GMM, Pamuku M, Kingston HMS. Determination of Chromium Species in Dietary Supplements Using Speciated Isotope Dilution Mass Spectrometry with Mass Balance. *Journal of Agricultural and Food Chemistry*. 2013;61(41):9966-76. doi: 10.1021/jf403067c.
9. Liu X, Dong H, Yang X, Kovarik L, Chen Y, Zeng Q. Effects of citrate on hexavalent chromium reduction by structural Fe(II) in nontronite. *Journal of Hazardous Materials*. 2018;343:245-54. PubMed PMID: WOS:000414106700028.
10. Daud MK, Mei L, Variath MT, Ali S, Li C, Rafiq MT, et al. Chromium (VI) Uptake and Tolerance Potential in Cotton Cultivars: Effect on Their Root Physiology, Ultramorphology, and Oxidative Metabolism. *Biomed Research International*. 2014. PubMed PMID: WOS:000336305400001.
11. Balamurugan K, Rajaram R, Ramasami T, Narayanan S. Chromium(III)-induced apoptosis of lymphocytes: Death decision by ROS and Src-family tyrosine kinases. *Free Radical Biology and Medicine*. 2002;33(12):1622-40. PubMed PMID: WOS:000179840700003.
12. Bai JL, Xun PC, Morris S, Jacobs DR, Liu K, He K. Chromium exposure and incidence of metabolic syndrome among American young adults over a 23-year follow-up: the CARDIA Trace Element Study. *Scientific Reports*. 2015;5. PubMed PMID: WOS:000363141000001.
13. Kováčik J, Babula P, Klejdus B, Hedbavny J. Chromium Uptake and Consequences for Metabolism and Oxidative Stress in Chamomile Plants. *Journal of Agricultural and Food Chemistry*.

- 2013;61(33):7864-73. doi: 10.1021/jf401575a.
14. Baek S-A, Han T, Ahn S-K, Kang H, Cho MR, Lee S-C, et al. Effects of Heavy Metals on Plant Growths and Pigment Contents in *Arabidopsis thaliana*. *Plant Pathology Journal*. 2012;28(4):446-52. PubMed PMID: WOS:000311867800014.
15. Zayed A, Lytle CM, Qian JH, Terry N. Chromium accumulation, translocation and chemical speciation in vegetable crops. *Planta*. 1998;206(2):293-9. PubMed PMID: WOS:000075604400016.
16. Xu B, Wang F, Zhang Q, Lan Q, Liu C, Guo X, et al. Influence of iron plaque on the uptake and accumulation of chromium by rice (*Oryza sativa* L.) seedlings: Insights from hydroponic and soil cultivation. *Ecotoxicology and environmental safety*. 2018;162:51-8. PubMed PMID: MEDLINE:29960914.
17. Zhou W, Leul M. Uniconazole-induced alleviation of freezing injury in relation to changes in hormonal balance, enzyme activities and lipid peroxidation in winter rape. *Plant Growth Regul*. 1998;26(1):41-7. doi: 10.1023/A:1006004921265.
18. Beauchamp C, Fridovich I. Superoxide dismutase: improved assays and an assay applicable to acrylamide gels. *Analytical biochemistry*. 1971;44(1):276-87. PubMed PMID: MEDLINE:4943714.
19. Aebi H. Catalase Invitro. *Methods in Enzymology*. 1984;105:121-6. PubMed PMID: WOS:A1984AAB8100014.
20. Xie L, Hao P, Cheng Y, Ahmed IM, Cao F. Effect of combined application of lead, cadmium, chromium and copper on grain, leaf and stem heavy metal contents at different growth stages in rice. *Ecotoxicology and environmental safety*. 2018;162:71-6. PubMed PMID: MEDLINE:29990741.
21. Nakano Y, Asada K. Hydrogen-Peroxide Is Scavenged by Ascorbate-Specific Peroxidase in Spinach-Chloroplasts. *Plant and Cell Physiology*. 1981;22(5):867-80. PubMed PMID: WOS:A1981MC45000014.
22. Garcia-Limones C, Hervas A, Navas-Cortes JA, Jimenez-Diaz RM, Tena M. Induction of an antioxidant enzyme system and other oxidative stress markers associated with compatible and incompatible interactions between chickpea (*Cicer arietinum* L.) and *Fusarium oxysporum* f. sp. *ciceris*. *Physiological and Molecular Plant Pathology*. 2002;61(6):325-37. PubMed PMID: WOS:000182701300002.
23. Chen P-Y, Lee K-T, Chi W-C, Hirt H, Chang C-C, Huang H-J. Possible involvement of MAP kinase pathways in acquired metal-tolerance induced by heat in plants. *Planta*. 2008;228(3):499-509. PubMed PMID: WOS:000257594800012.
24. Eleftheriou EP, Adamakis I-DS, Panteris E, Fatsiou M. Chromium-Induced Ultrastructural Changes and Oxidative Stress in Roots of *Arabidopsis thaliana*. *International Journal of Molecular Sciences*. 2015;16(7):15852-71. PubMed PMID: WOS:000359900100087.
25. Mehmood T, Bibi I, Shahid M, Niazi NK, Murtaza B, Wang H, et al. Effect of compost addition on arsenic uptake, morphological and physiological attributes of maize plants grown in contrasting soils. *Journal of Geochemical Exploration*. 2017;178:83-91. doi: 10.1016/j.gexplo.2017.03.018.
26. Finnegan P, Chen W. Arsenic effects on plant metabolism. *Front Plant Physiol*. 2012;3:1-18.
27. Samantaray S, Rout GR, Das P. Induction, selection and characterization of Cr and Ni-tolerant cell lines of *Echinochloa colona* (L.) Link in vitro. *J Plant Physiol*. 2001;158(10):1281-90. PubMed PMID: WOS:000171799100005.
28. Khanna P, Ong C, Bay BH, Baeg GH. Nanotoxicity: An interplay of oxidative stress, inflammation and cell death. *Nanomaterials*. 2015;5(3):1163-80. doi: 10.3390/nano5031163.
29. Gallego SM, Pena LB, Barcia RA, Azpilicueta CE, Iannone MF, Rosales EP, et al. Unravelling cadmium toxicity and tolerance in plants: Insight into regulatory mechanisms. *Environmental and Experimental*

- 402 Botany. 2012;83:33-46. doi: 10.1016/j.envexpbot.2012.04.006.
- 403 30. Hosseini MS, Samsampour D, Ebrahimi M, Abadía J, Khanahmadi M. Effect of drought stress on
- 404 growth parameters, osmolyte contents, antioxidant enzymes and glycyrrhizin synthesis in licorice
- 405 (*Glycyrrhiza glabra* L.) grown in the field. *Phytochemistry*. 2018;156:124-34. doi:
- 406 10.1016/j.phytochem.2018.08.018.
- 407 31. Liu J, Ding G, Gai Z, Zhang W, Han Y, Li W. Changes in the gene expression profile of *Arabidopsis*
- 408 *thaliana* under chromium stress. *Ecotoxicol Environ Saf*. 2020;193:110302. doi:
- 409 10.1016/j.ecoenv.2020.110302. PubMed PMID: 32087445.
- 410 32. Pan C, Lu H, Yu J, Liu J, Liu Y, Yan C. Identification of Cadmium-responsive *Kandelia obovata* SOD
- 411 family genes and response to Cd toxicity. *Environmental and Experimental Botany*. 2019;162:230-8. doi:
- 412 10.1016/j.envexpbot.2019.02.018.
- 413 33. Zamani Z, Amiri H, Ismaili A. Improving drought stress tolerance in fenugreek (*Trigonella foenum-*
- 414 *graecum*) by exogenous melatonin. *Plant Biosystems*. 2019. doi: 10.1080/11263504.2019.1674398.
- 415 34. Banerjee A, Samanta S, Roychoudhury A. Spermine ameliorates prolonged fluoride toxicity in soil-
- 416 grown rice seedlings by activating the antioxidant machinery and glyoxalase system. *Ecotoxicology and*
- 417 *Environmental Safety*. 2020;189. PubMed PMID: WOS:000507711500018.
- 418

A

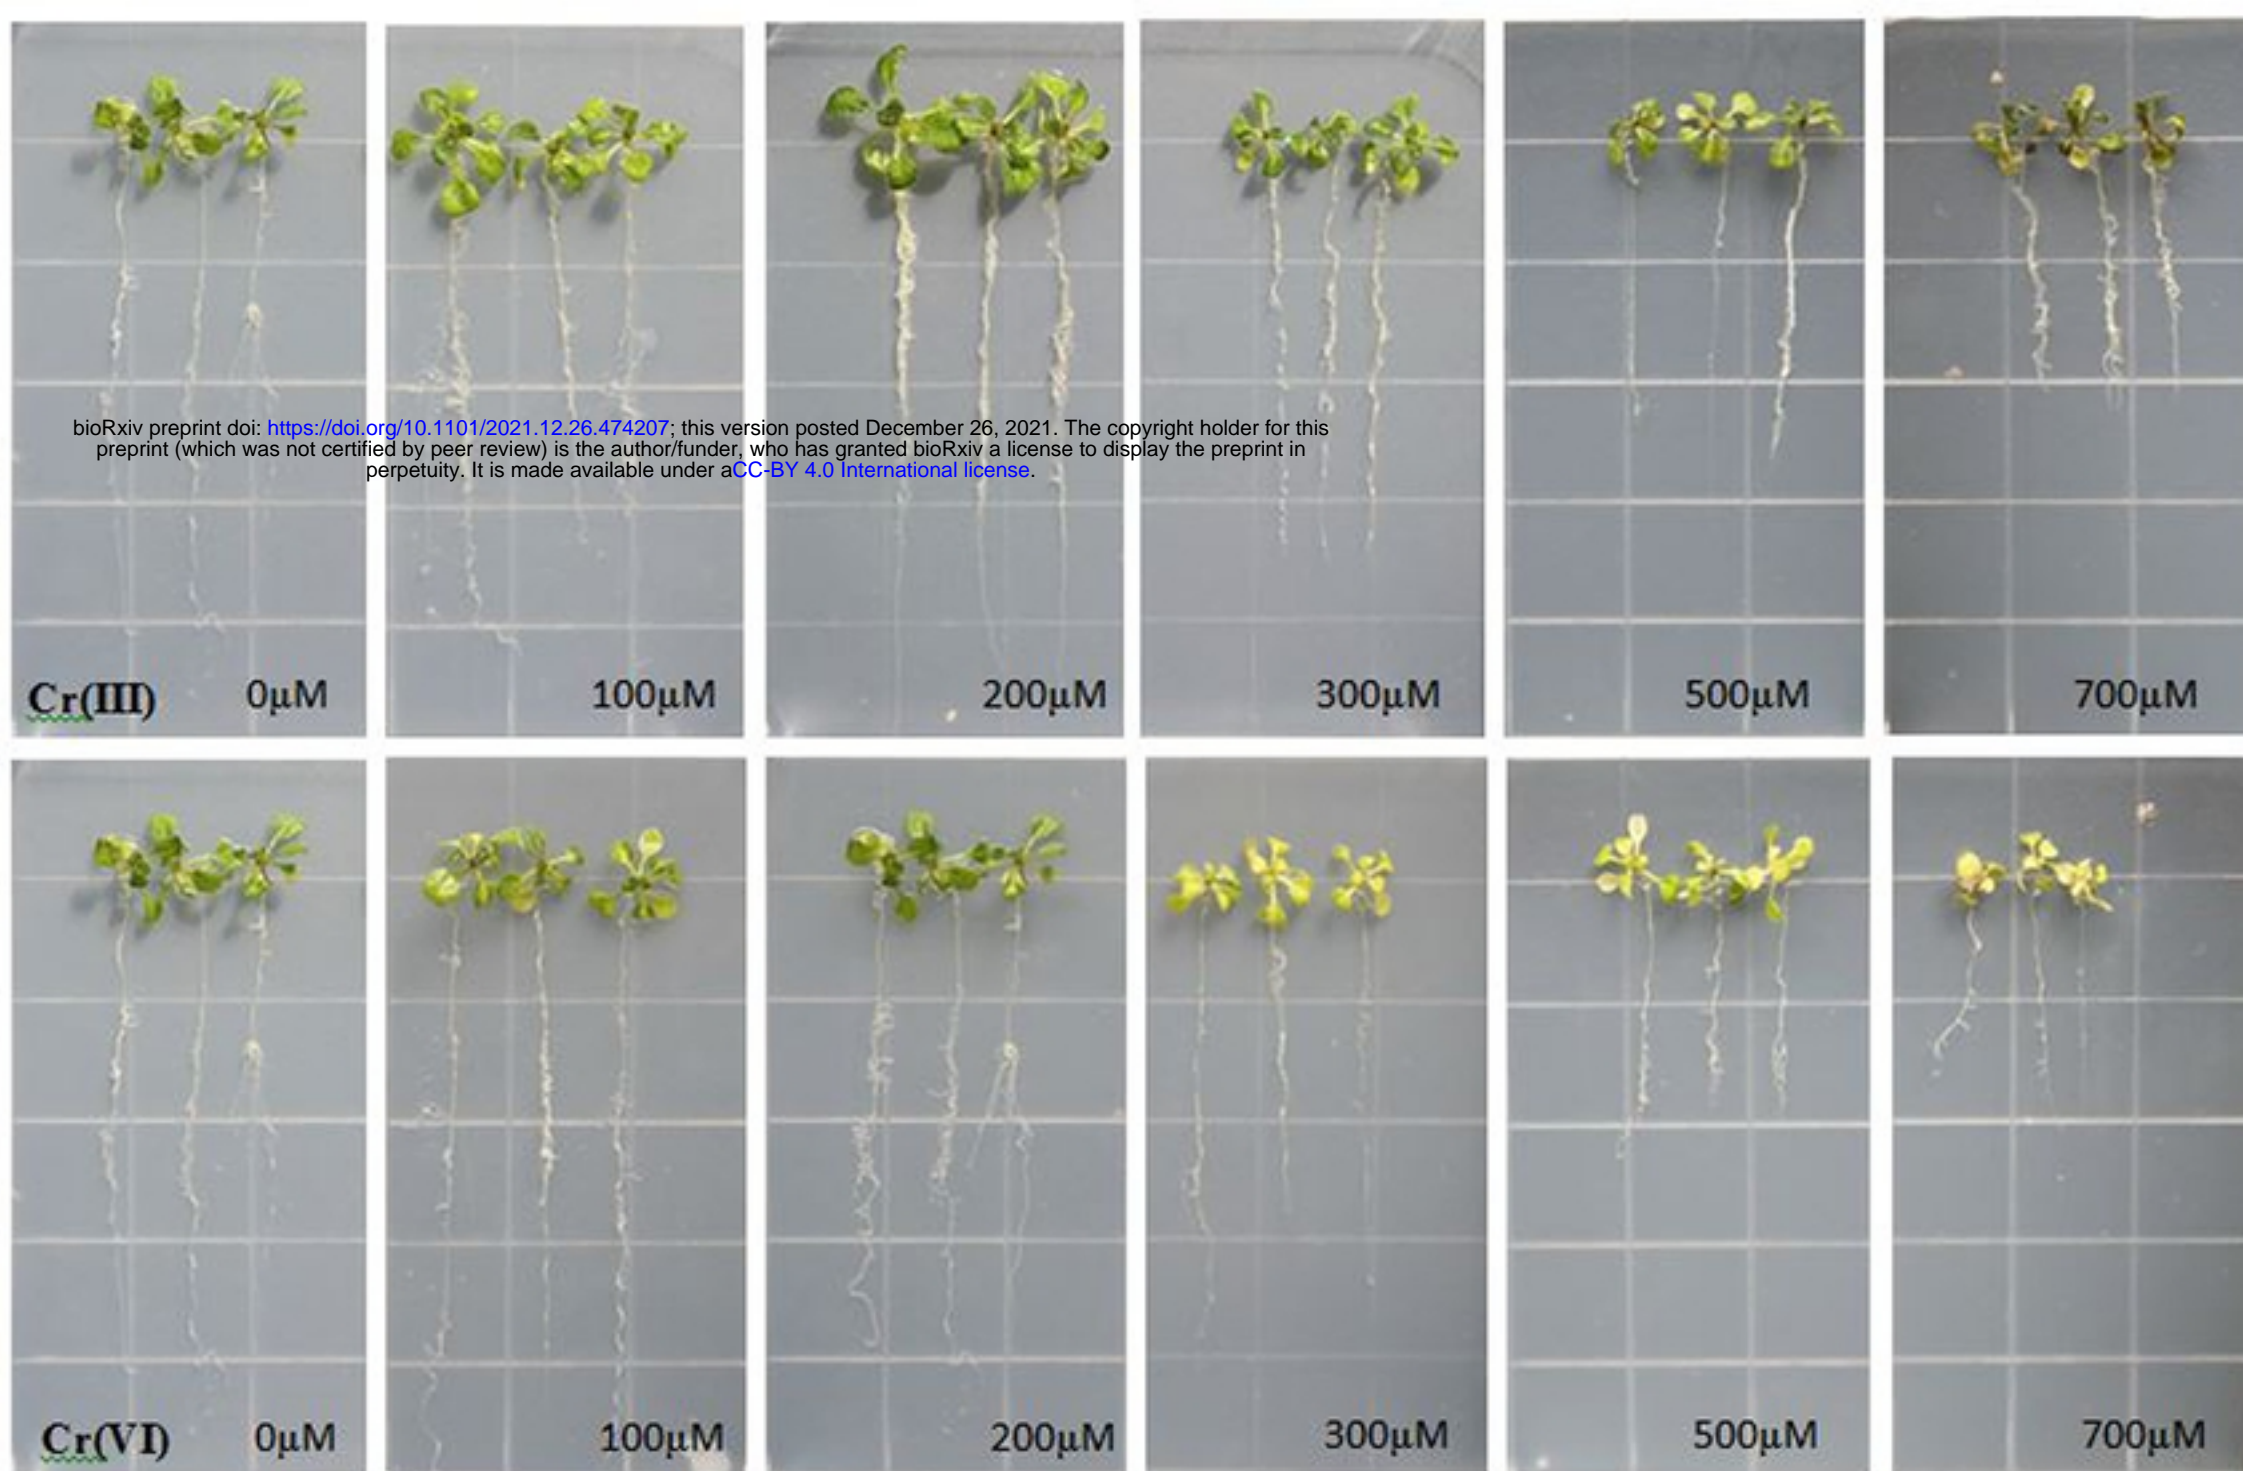

B

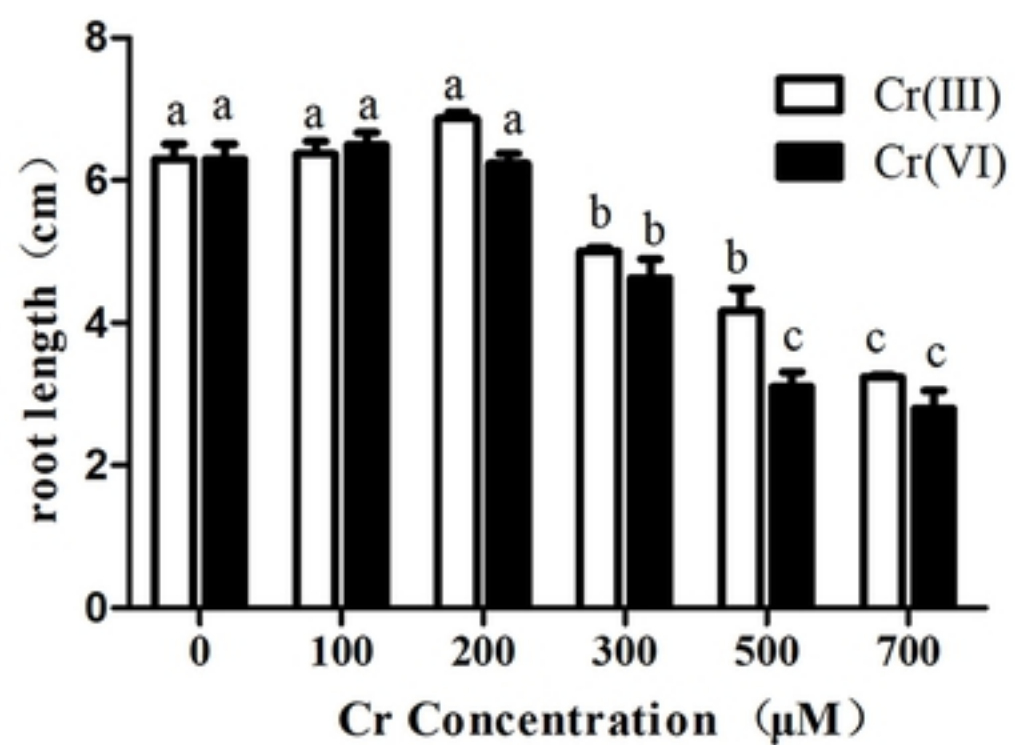

C

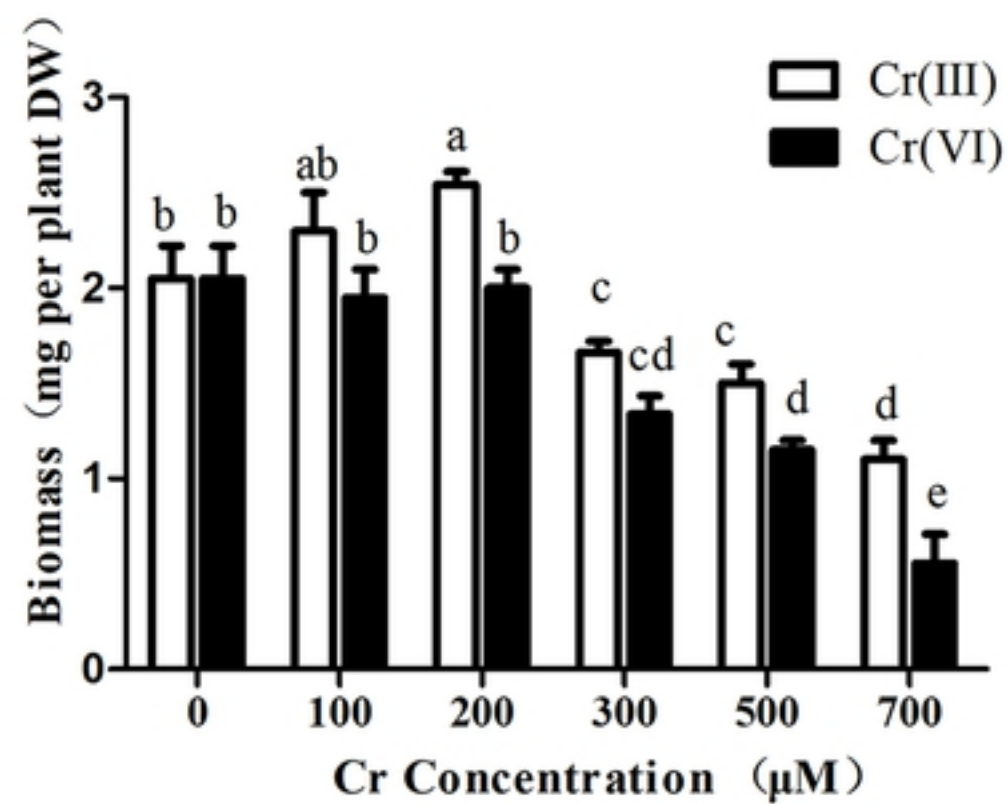

Figure

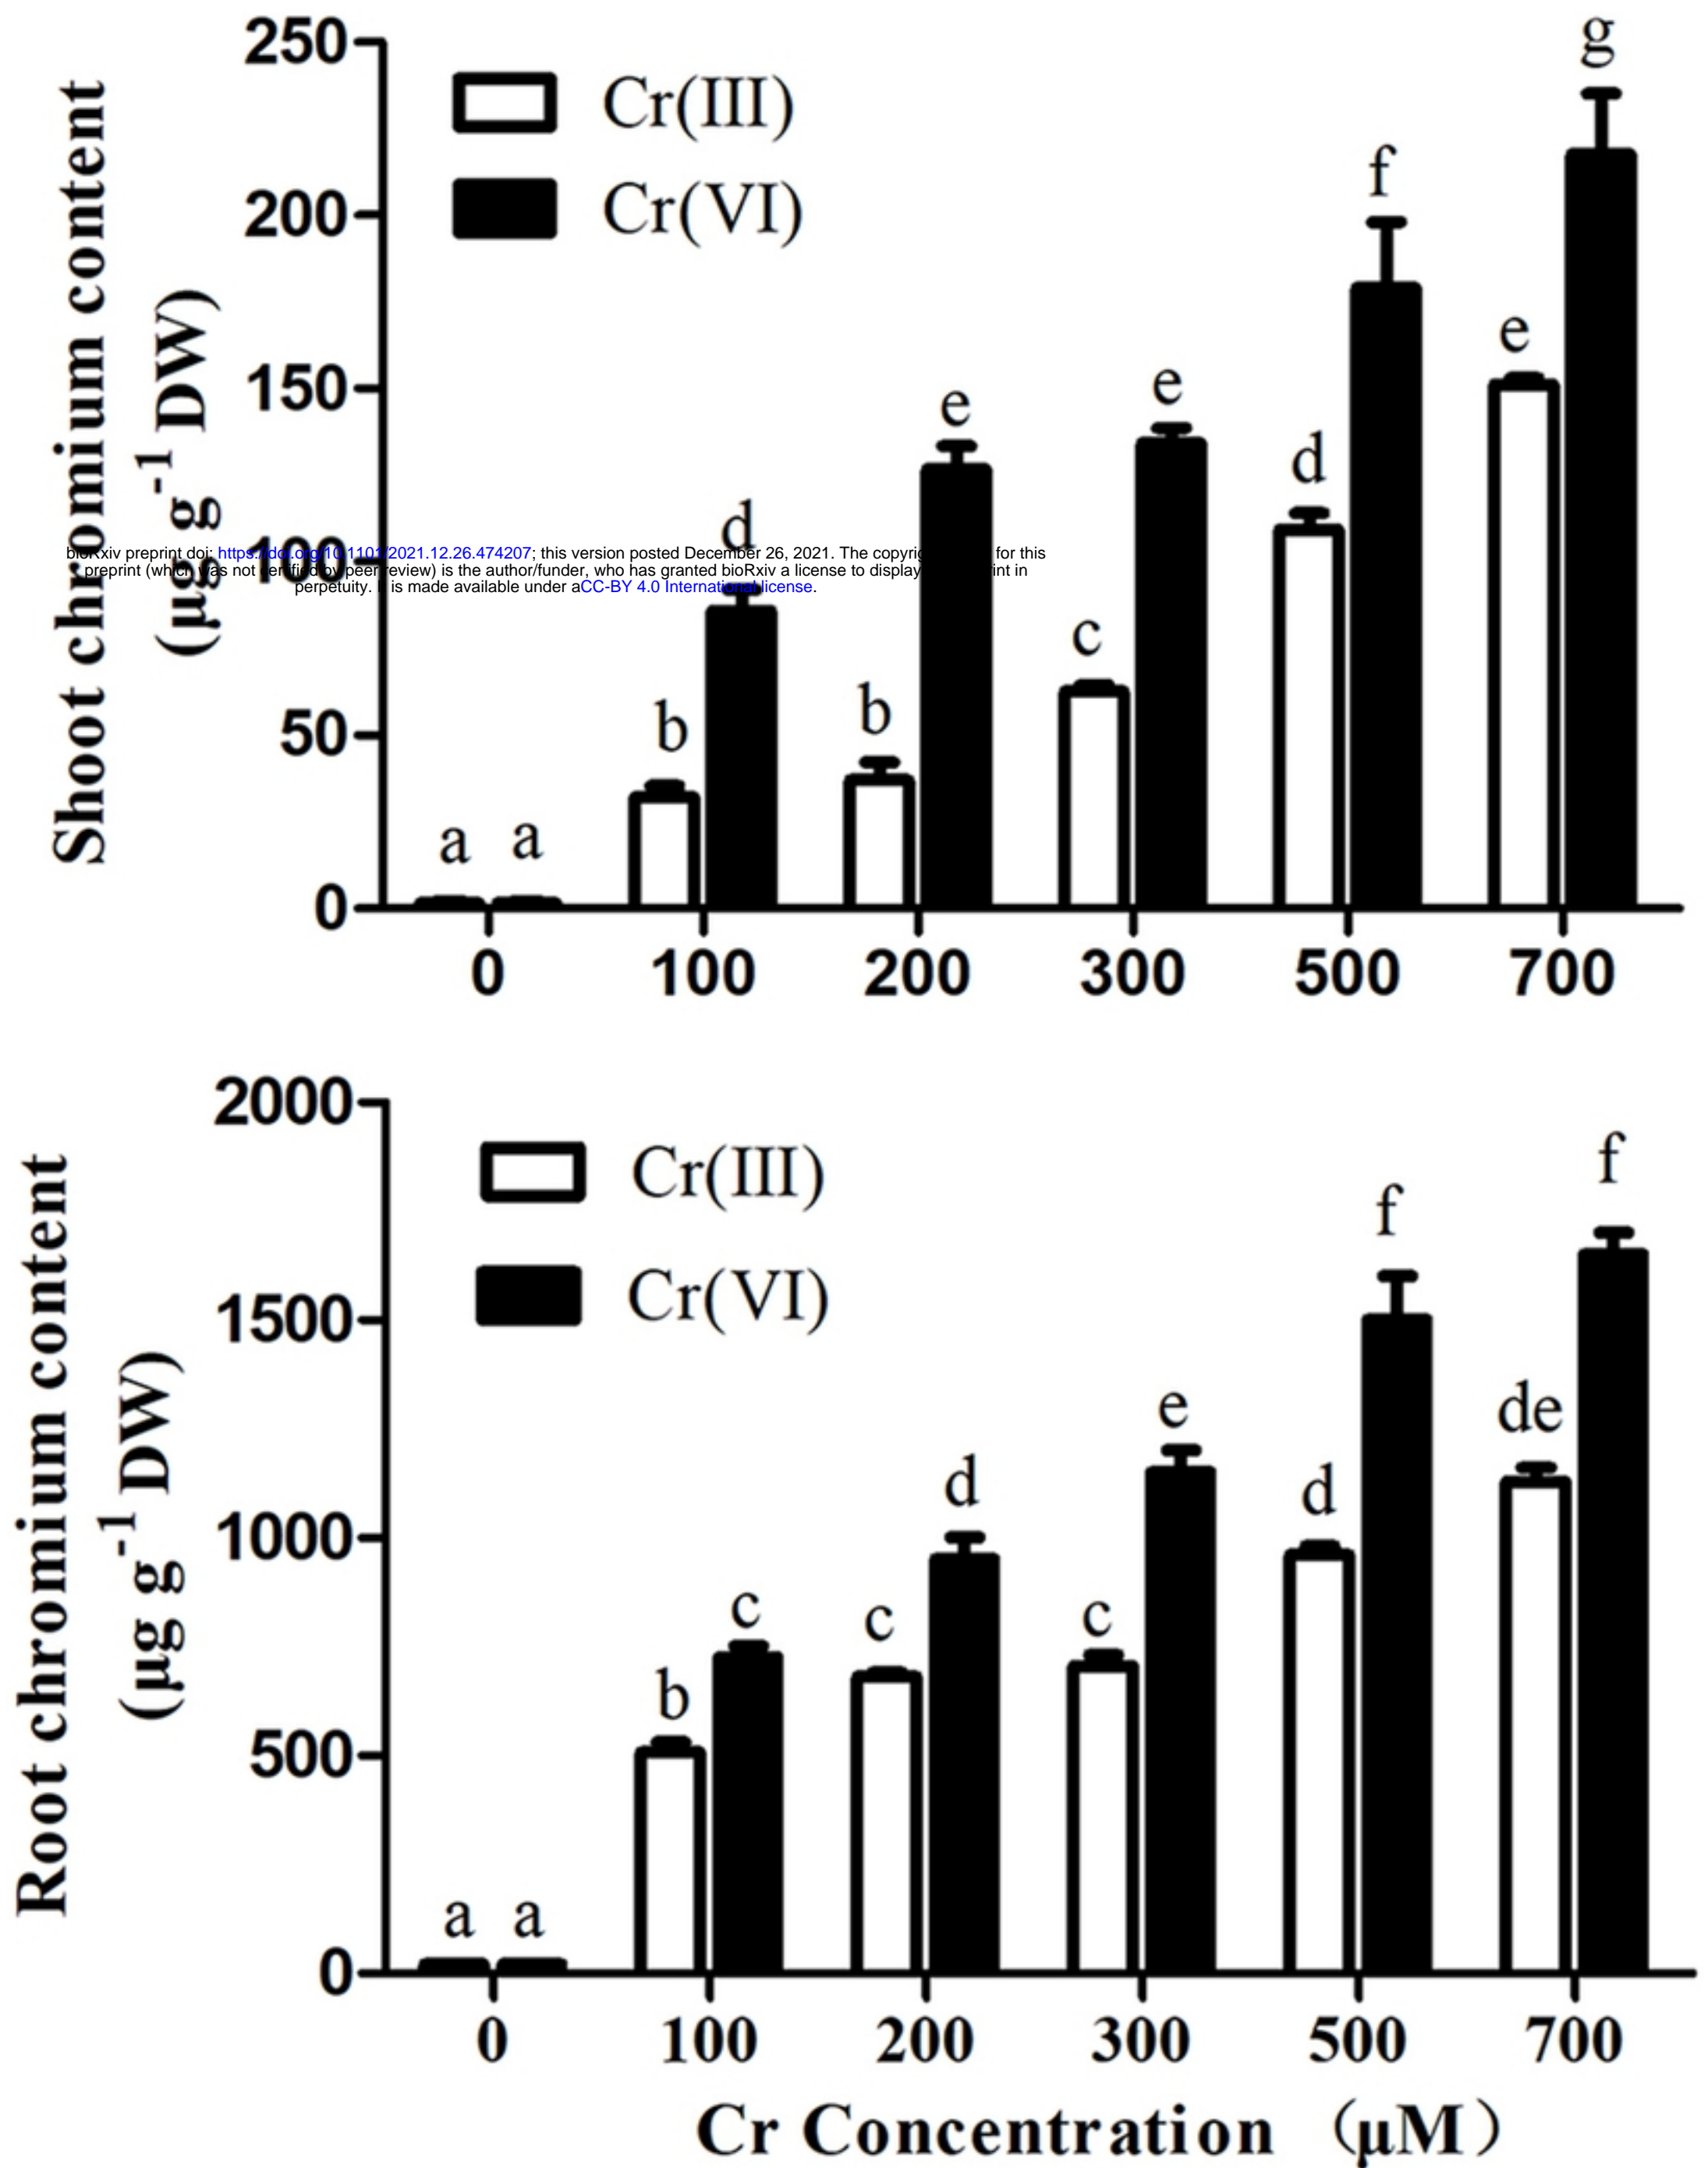

Figure

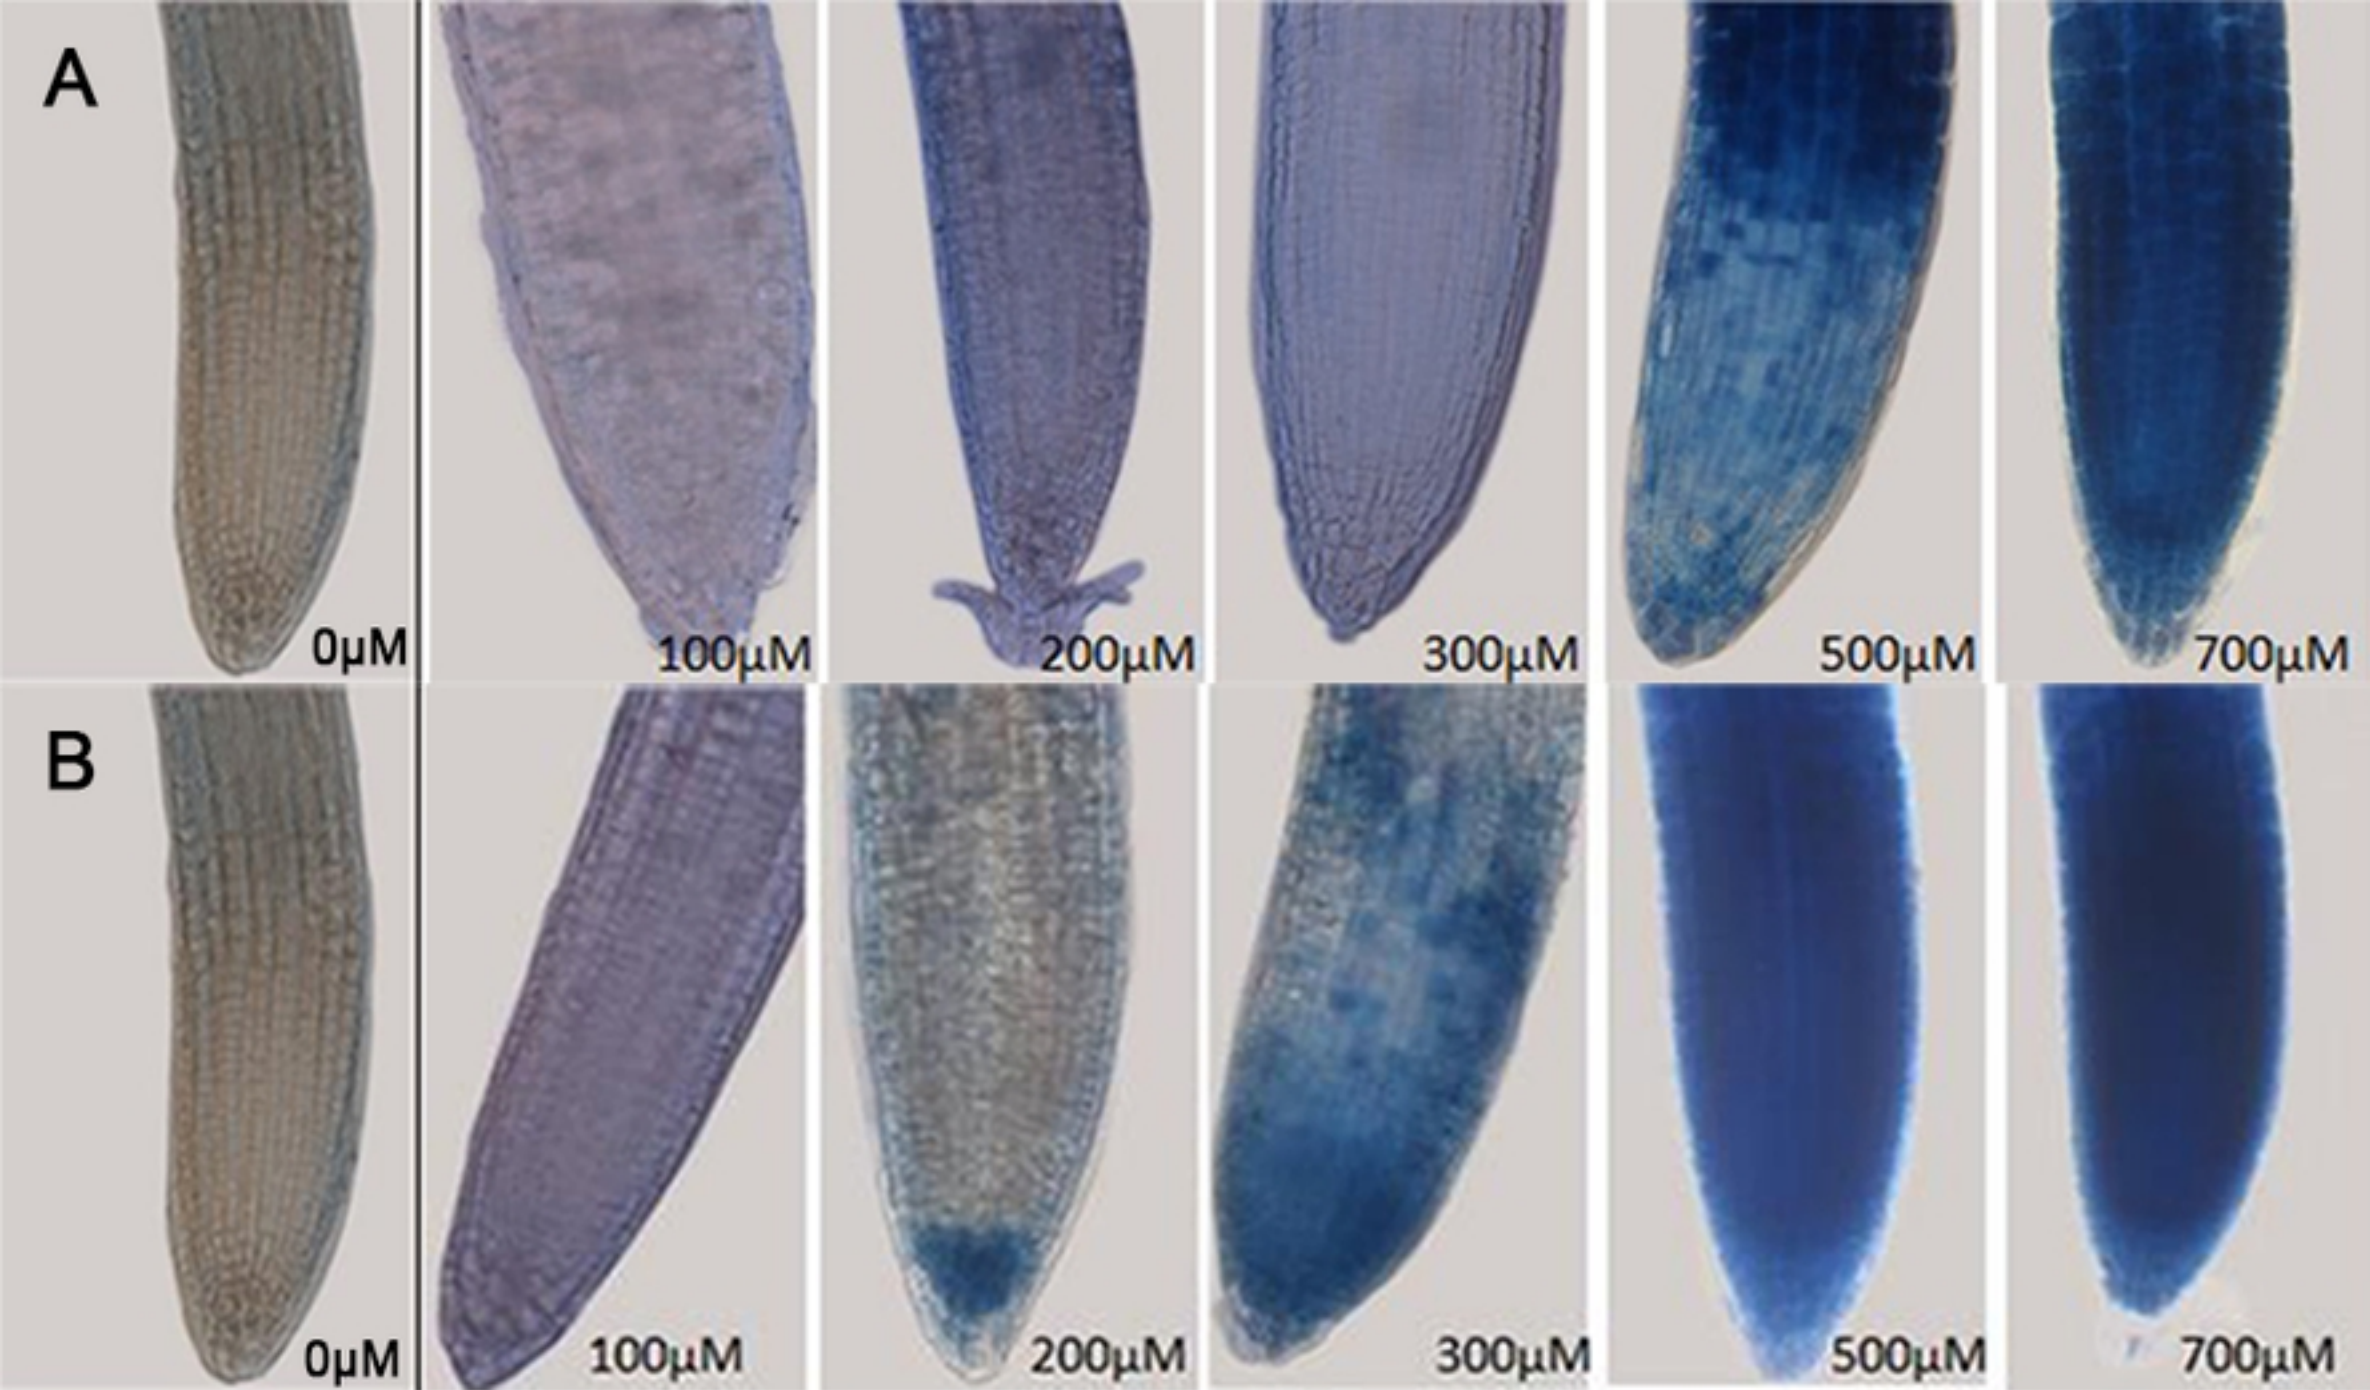

Figure

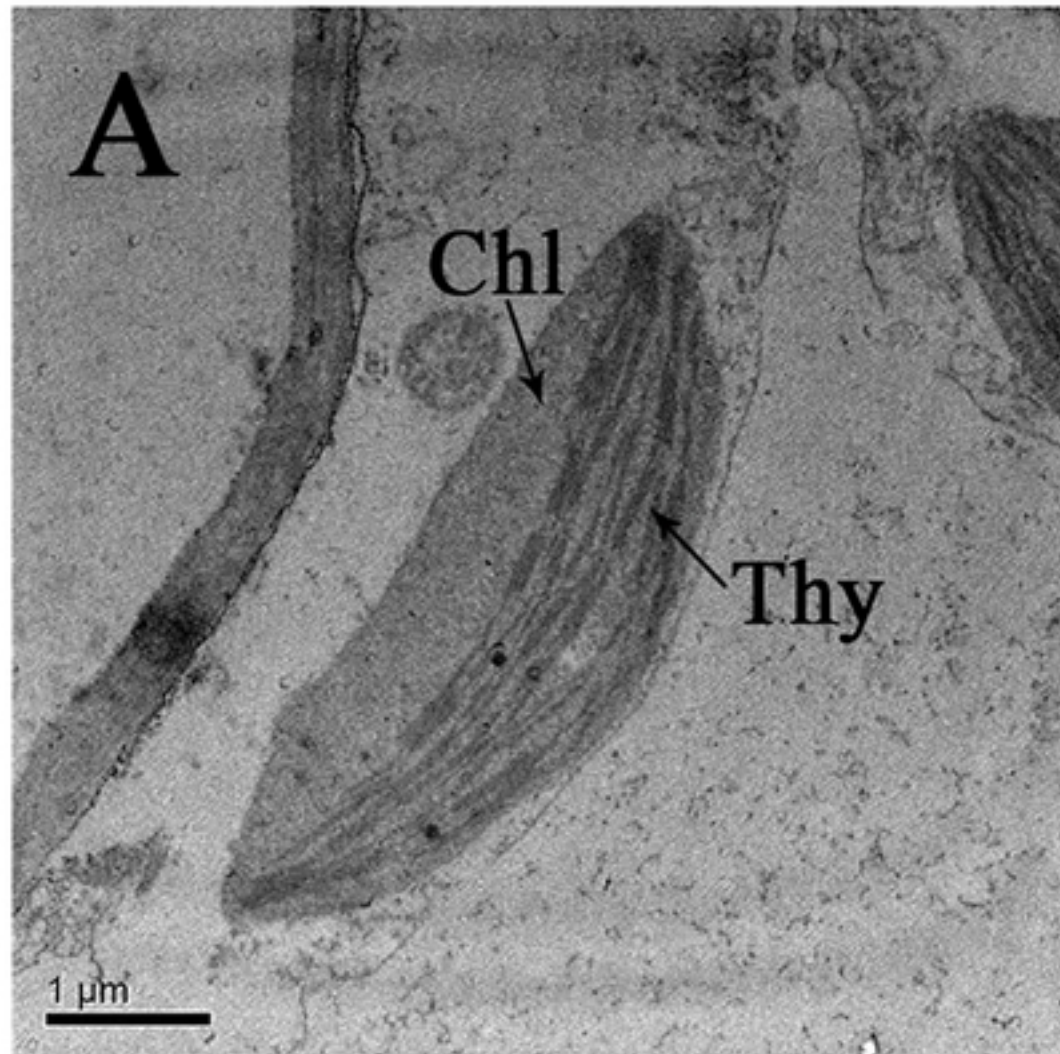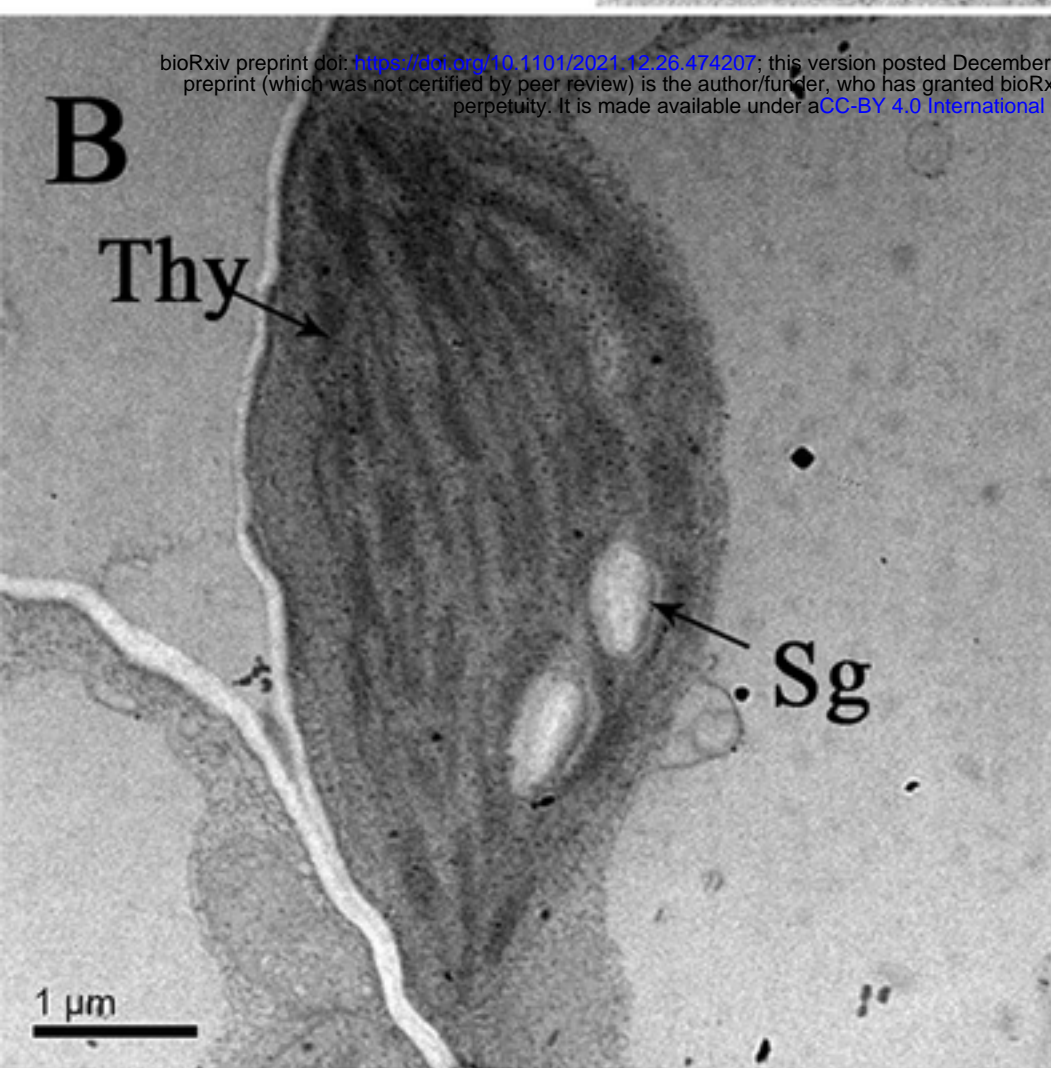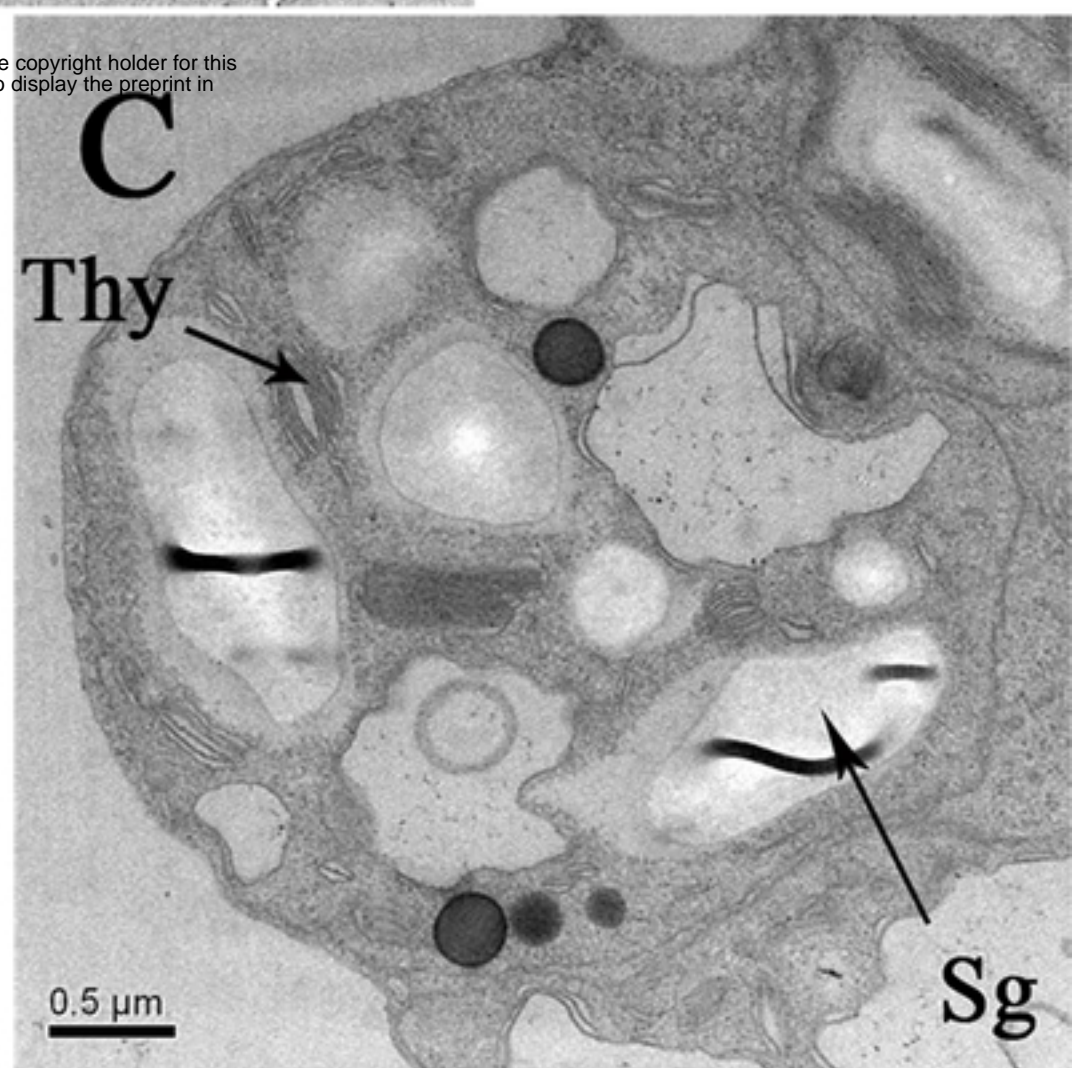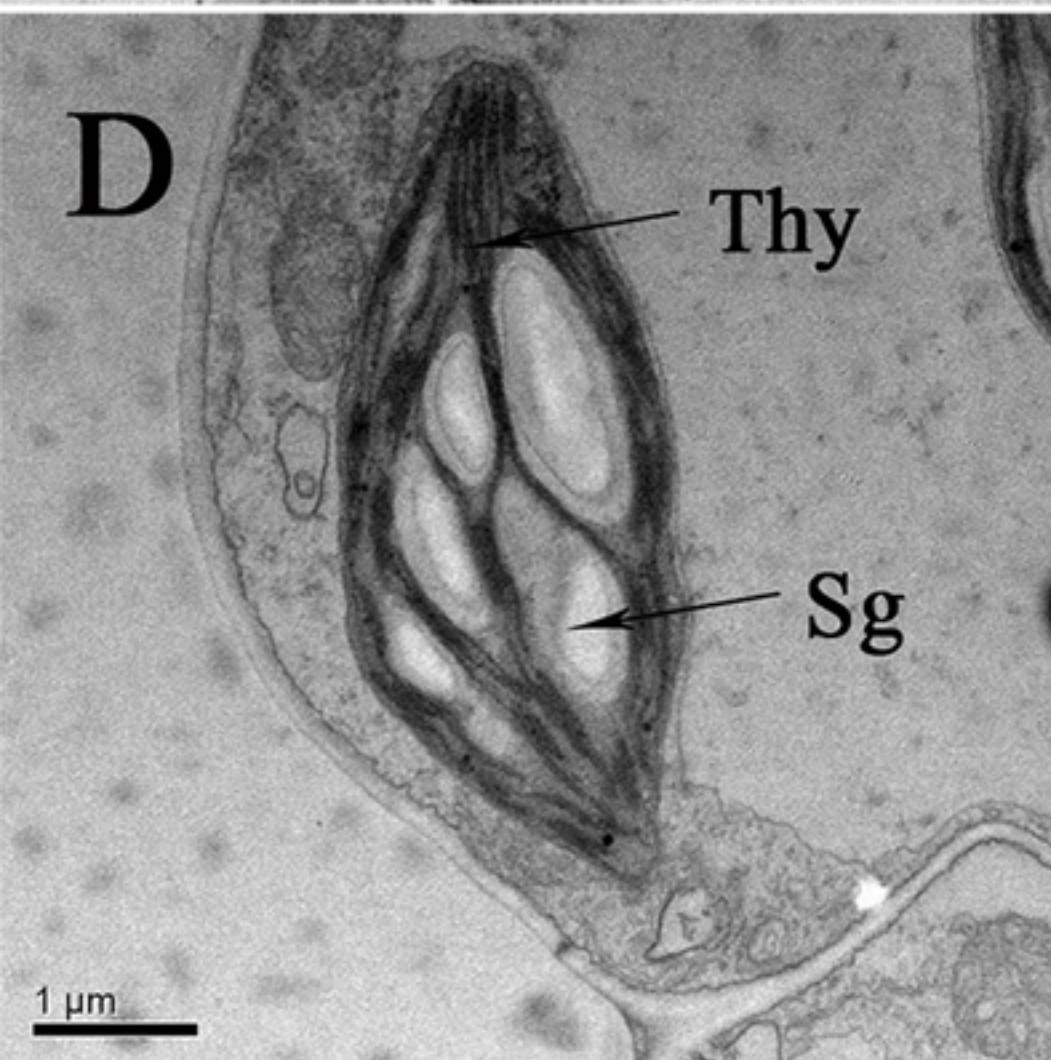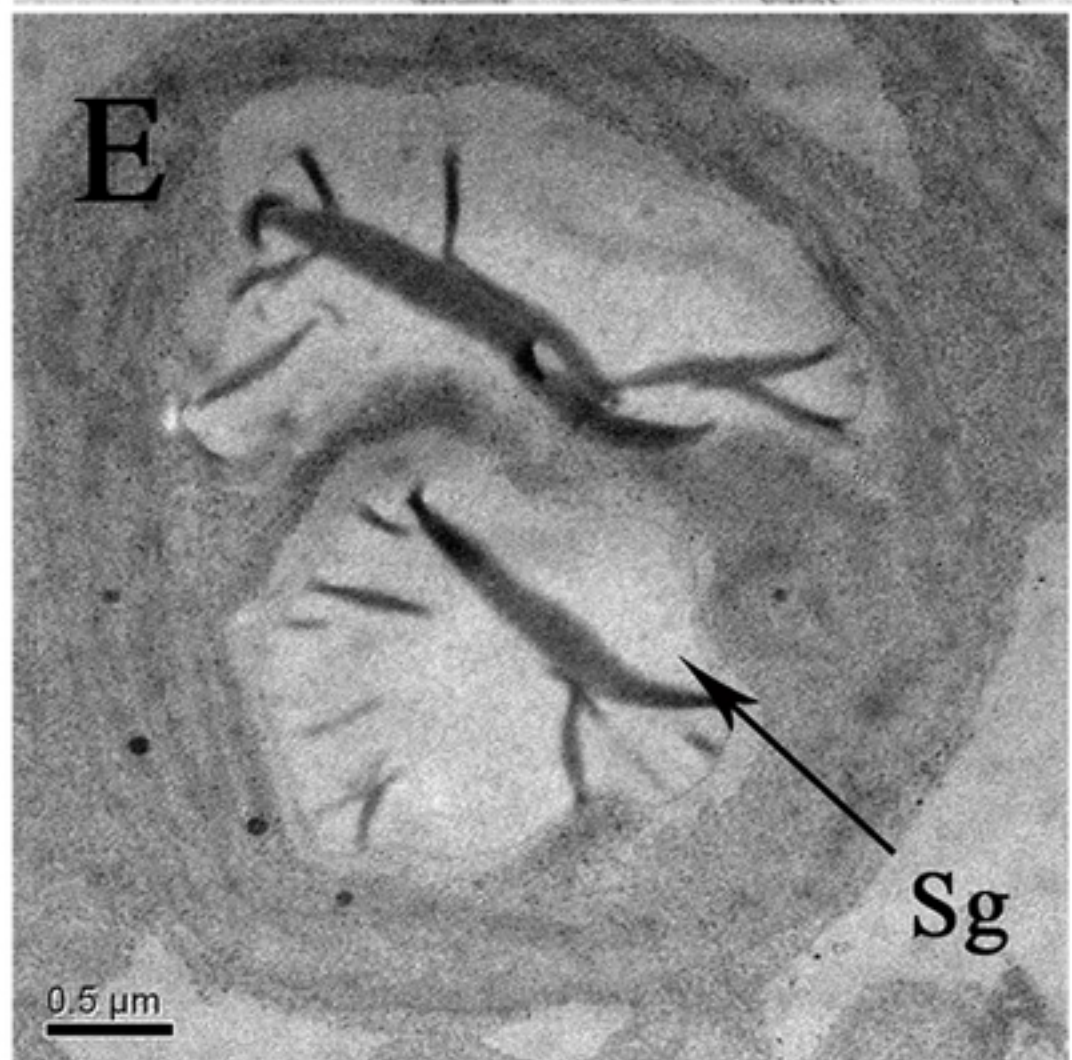

Figure
